# Supplementary material for: Strengthening the cellular function of dermal fibroblasts and dermal papilla cells using nanovesicles extracted from stem cells using blue light-based photobiomodulation technology
Source: Royal Society of Chemistry journal article supplement (doi:10.1039/d4bm01591f), 2025-01-01
Supplement: d4bm01591f1.pdf [file d4bm01591f1.pdf]

**Supplementary Figure**

**Strengthening the cellular function of dermal fibroblasts and dermal papilla cells using nanovesicles extracted from stem cells using blue light-based photobiomodulation technology**

Jiyu Hyun<sup>a,†</sup>, Sang Yoon Lee<sup>a,†</sup>, Jiseon An<sup>a</sup>, You Bin Lee<sup>a</sup>, and Suk Ho Bhang<sup>a,\*</sup>

*<sup>a</sup>School of Chemical Engineering, Sungkyunkwan University, Suwon 16419, Republic of Korea*

**† These authors contributed equally to this work**

**\*Corresponding author:** Suk Ho Bhang, Ph.D.

Tel.: +82-31-290-7242; Fax.: +82-31-290-7272; e-mail address: [sukhobhang@skku.edu](mailto:sukhobhang@skku.edu)

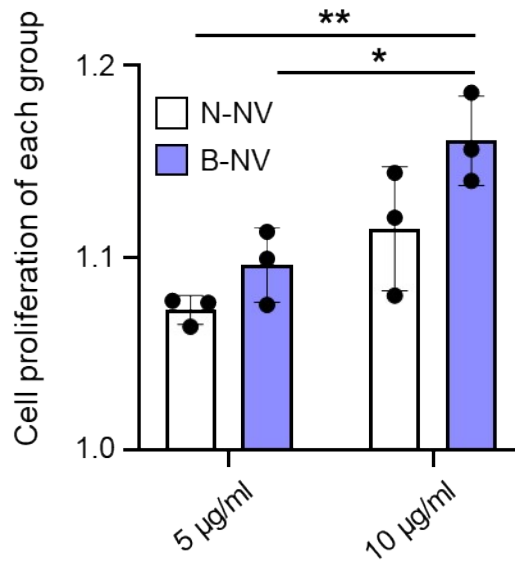

**Supplementary Fig. 1.** Comparison of cell proliferation after treating 5 µg/ml or 10 µg/ml of N-NV or B-NV to hDFs (n = 3, \*p < 0.05 and \*\*p < 0.01 compared to 5 µg/ml of N-NV treated group).

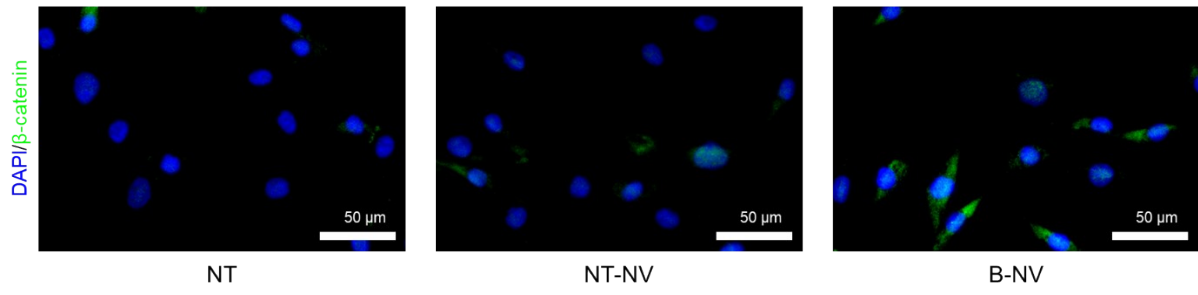

**Supplementary Fig. 2.** Representative images of immunofluorescence staining of  $\beta$ -catenin in each group.

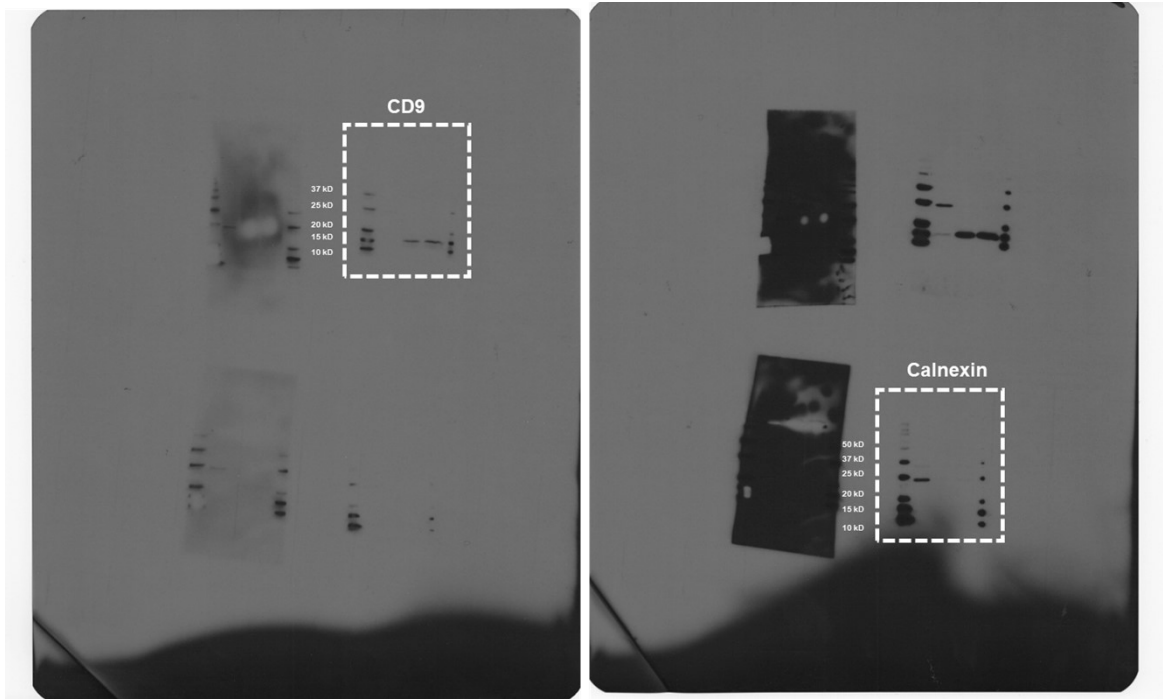

**Supplementary Fig. 3.** Raw image of western blot result in Fig. 2B.
